# Supplementary material for: Molecule-Resolved Visualization of Particulate Matter on Human Skin Using Multimodal Nonlinear Optical Imaging
Source: MDPI journal article supplement (doi:10.3390/ijms22105199), 2021-05-14
Supplement: s1 [file s1]

## Supplementary Materials

### Molecule-resolved visualization of particulate matter on human skin using multimodal nonlinear optical imaging

Eun-Soo Lee<sup>1†</sup>, Suho Kim<sup>2,3†</sup>, Sang-Won Lee<sup>3,4</sup>, Jinsang Jung<sup>5</sup>, Sung Hoon Lee<sup>1</sup>, Hye-Won Na<sup>1</sup>, Hyoun-June Kim<sup>1</sup>, Yong Deog Hong<sup>1</sup>, Won Seok Park<sup>1</sup>, Tae Geol Lee<sup>3</sup>, Dong-Gyu Jo<sup>2</sup>, and Se-Hwa Kim<sup>3,4\*</sup>

<sup>1</sup>AMOREPACIFIC Research and Development Center, Yongin 17074, Rep. of Korea

<sup>2</sup>School of Pharmacy, Sungkyunkwan University, Suwon 16419, Rep. of Korea

<sup>3</sup>Safety Measurement Institute, Korea Research Institute of Standards and Science, Daejeon 34113, Rep. of Korea

<sup>4</sup>Department of Medical Physics, University of Science and Technology, Daejeon 34113, Rep. of Korea

<sup>5</sup>Gas Metrology Group, Division of Chemical and Biological Metrology, Korea Research Institute of Standards and Science, Daejeon 34113, Rep. of Korea

## Contents

**Supplementary Figure S1.** *En face* MNLO imaging of human skin biopsy samples treated with PAH.

**Supplementary Video S1.** Visualization of PM<sub>2.5</sub> in human skin by *en face* 3D MNLO imaging.

**Supplementary Video S2.** Visualization and analysis of PM<sub>2.5</sub> penetration into human skin by MNLO imaging.

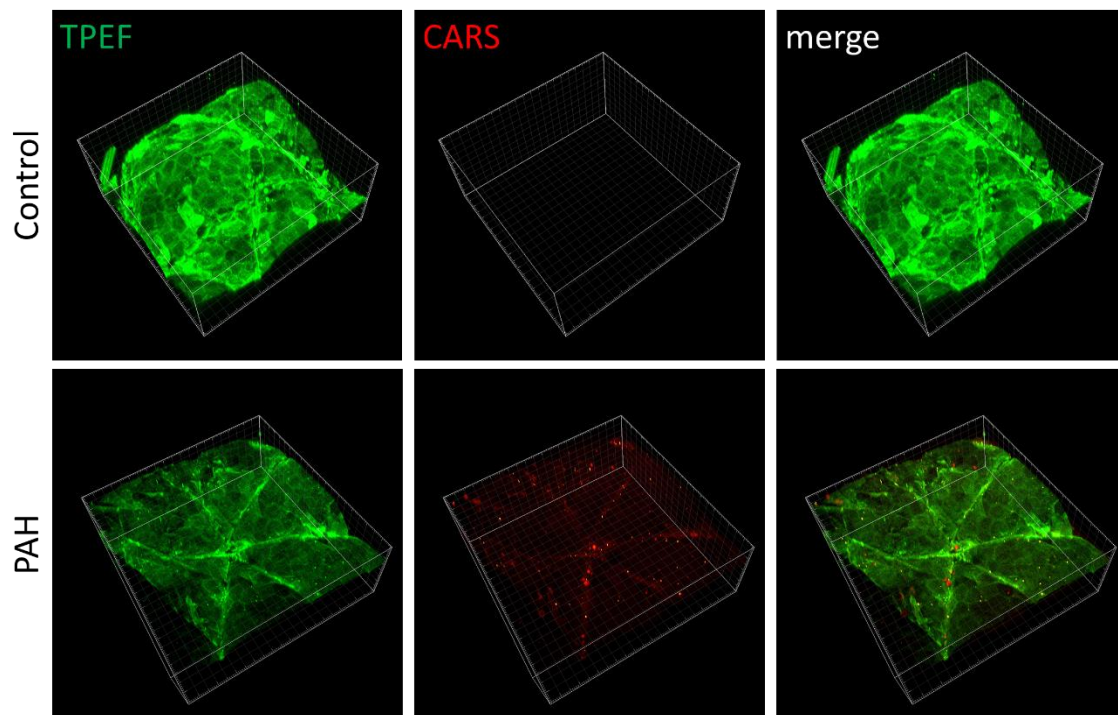

**Supplementary Figure S1.** *En face* MNLO imaging of human skin biopsy samples treated with PAH. 0.6  $\mu\text{g/ml}$  of PAH- or vehicle-treated samples for 24 h. TPEF signals (green) were measured at Ex.810 nm/Em. 495–540 nm and C–C CARS signals (red) were obtained at 2693  $\text{cm}^{-1}$ . Measurement volume was 420 (x) x 420 (y) x 200 (z)  $\mu\text{m}^3$ .

**Supplementary Video S1.** Visualization of PM<sub>2.5</sub> in human skin by *en face* 3D MNLO imaging. *En face* MNLO images of the label-free stratum corneum (TPEF, green) and PM<sub>2.5</sub> (CARS, red in upper panel and yellow in lower panel) in human skin biopsy samples after PM<sub>2.5</sub> exposure. Consecutive *en face* MNLO image slices were reconstructed in 3D.

**Supplementary Video S2.** Visualization and analysis of PM<sub>2.5</sub> penetration into human skin by MNLO imaging. MNLO images of label-free elastin and keratin (TPEF, green), PM<sub>2.5</sub> (CARS, red), and collagen (SHG, magenta) in cross-sectioned PM<sub>2.5</sub>-exposed human skin biopsy samples after 50 strippings. Consecutive *en face* MNLO image slices were reconstructed in 3D.
